# Supplementary material for: Potentiometric and 1H and 19F NMR studies of the Th(iv)–5-sulfosalicylate–OH––F– systemElectronic supplementary information (ESI) available: Table S1: a summary of experimental conditions used in titrations using buffers of H2SSA–/HSSA2–. See http://www.rsc.org/suppdata/dt/b3/b301188g/
Source: Royal Society of Chemistry journal article supplement (doi:10.1039/b301188g), 2003-03-14
Supplement: b301188g.doc [file b301188g.doc]

# Supplementary information

Table S1. A summary of the experimental conditions used in *Titrations using buffers of H2SSA-/HSSA2-*. All experiments were carried out at constant sodium concentration, [Na+] = 1.00 M.

|  | Vessel | Titrant | Buffer ratio |
| --- | --- | --- | --- |
| *Series* 1 | [Th4+] = 10.00 mM  [HClO4] = 1.87 mM | [HA] = 28.6 mM  [A] = 28.6 mM | 1 : 1 |
| *Series* 2 | [HA] = 16.2 mM  [A] = 37.8 mM | 2.33 : 1 |
| *Series* 3 | [HA] = 5.1 mM  [A] = 46.2 mM | 9.06 : 1 |
